# Supplementary material for: Long-term stable and highly efficient perovskite solar cells with a formamidinium chloride (FACl) additive
Source: Royal Society of Chemistry journal article supplement (doi:10.1039/d0ta05676f), 2020-01-01
Supplement: d0ta05676f1.pdf [file d0ta05676f1.pdf]

## Supplementary Information

### Long-term Stable and Highly Efficient of Perovskite Solar Cells with Formamidinium Chloride (FACl) Additive

Shuai You, Xiaoyan Xi, Xin Zhang, Hanying Wang, Shiqing Bi,\*Jianqi Zhang,\* Huiqiong Zhou\*,  
Zhixiang Wei

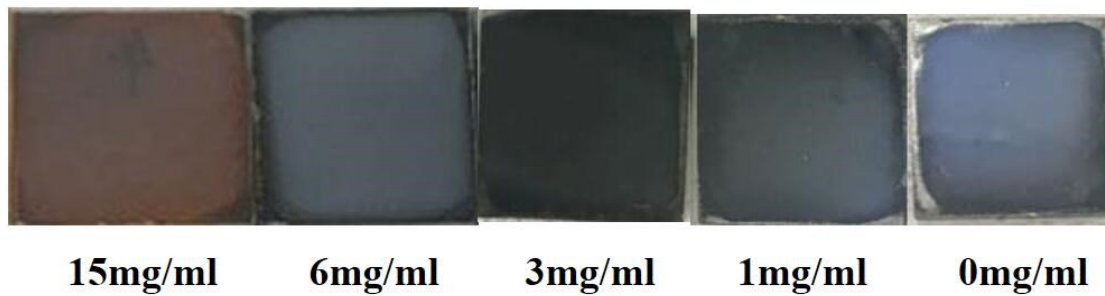

**Figure S1.** Optical photograph of perovskite films with different concentrations of FAcI under 100°C annealing.

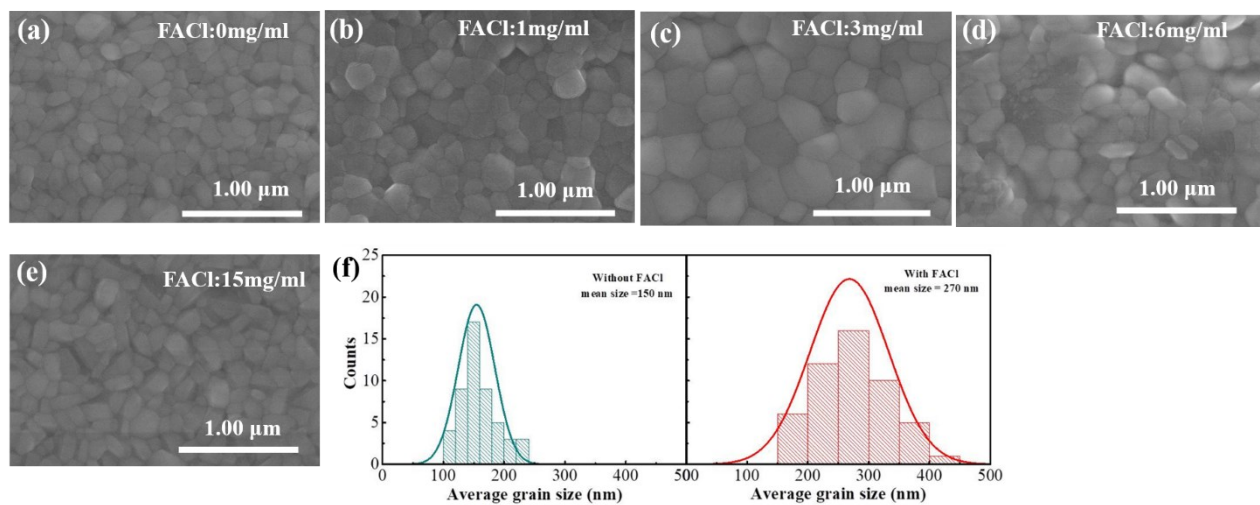

**Figure S2.** (a)-(e) SEM of perovskite films with different concentrations of FAcI under 100 °C annealing, (f) the grain size distribution histograms of perovskite film without and with 3mg/ml FAcI

**Table S1.** Time constants related to the fast ( $\tau_1$ ) and slow ( $\tau_2$ ) decays extracted from time-resolved PL spectroscopy of  $\text{FA}_{0.85}\text{MA}_{0.15}\text{PbI}_x\text{Br}_{3-x}$  films.

|             | $\tau_1$ (ns) | $\tau_2$ (ns) |
|-------------|---------------|---------------|
| pristine    | 25.6          | 36.7          |
| FAI(3mg/ml) | 227.8         | 356.2         |

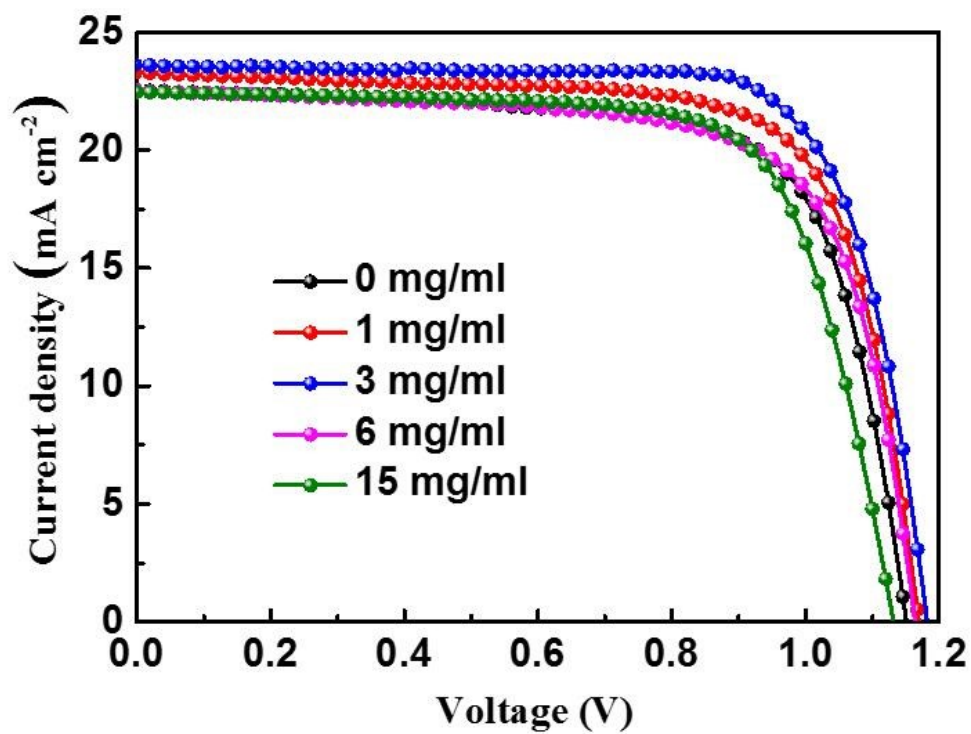

**Figure S3.**  $J$ - $V$  curves of PSCs with different concentrations of FACl additive in perovskite precursor solutions under AM 1.5G illumination of  $100 \text{ mW cm}^{-2}$

**Table S2.** Photovoltaics parameters of perovskite solar cells with different concentrations (mg/ml) of FAcI additive in perovskite precursor solutions measured under standard 1 sun irradiation (reverse scan)

|         | $V_{oc}$ (V)      | $J_{sc}$ (mA/cm <sup>2</sup> ) | FF (%)             | PCE (%)                         |
|---------|-------------------|--------------------------------|--------------------|---------------------------------|
| 0       | 1.15±0.02(1.152)  | 22.41±0.52 (22.53)             | 68.35±3.31 (71.79) | 17.10±1.55 (18.60) <sup>a</sup> |
| 1mg/ml  | 1.16±0.08 (1.169) | 22.83±0.42 (23.28)             | 71.12±3.26 (73.07) | 18.52±1.28 (19.88) <sup>a</sup> |
| 3mg/ml  | 1.18±0.03 (1.183) | 23.26±0.45 (23.63)             | 74.15±2.31 (75.21) | 20.46±0.55 (21.02) <sup>a</sup> |
| 6mg/ml  | 1.16±0.04 (1.163) | 22.46±0.43 (22.51)             | 69.26±2.78 (71.20) | 17.71±0.92 (18.63) <sup>a</sup> |
| 15mg/ml | 1.13±0.03 (1.136) | 22.38±0.52 (22.47)             | 68.16±3.12 (70.67) | 16.56±1.48 (18.04) <sup>a</sup> |

<sup>a</sup>Numbers in parentheses show the champion device parameters.

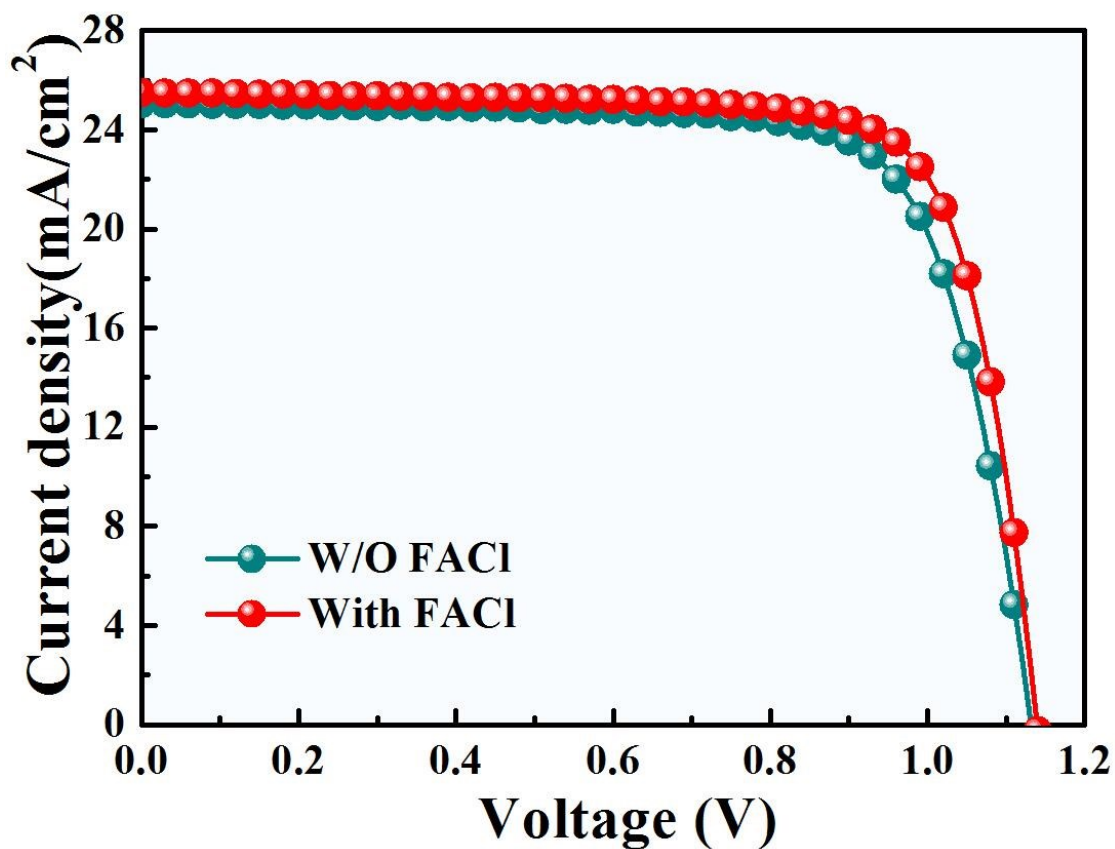

Figure S4. J–V curves for the planar perovskite solar cells with and without FACL.

( $\text{Cs}_{0.05}\text{FA}_{0.85}\text{MA}_{0.10}\text{Pb}(\text{I}_{0.97}\text{Br}_{0.03})_3$ -based PSCs).

Table S3 Photovoltaics parameters (best) of  $\text{Cs}_{0.05}\text{FA}_{0.85}\text{MA}_{0.10}\text{Pb}(\text{I}_{0.97}\text{Br}_{0.03})_3$ -based PSCs with and without FACL

| Sample       | $V_{oc}$ (V) | $J_{sc}$ ( $\text{mA}/\text{cm}^2$ ) | FF (%) | PCE (%) |
|--------------|--------------|--------------------------------------|--------|---------|
| Without FACL | 1.132        | 25.05                                | 75.36  | 21.37   |
| With FACL    | 1.139        | 25.50                                | 77.67  | 22.56   |

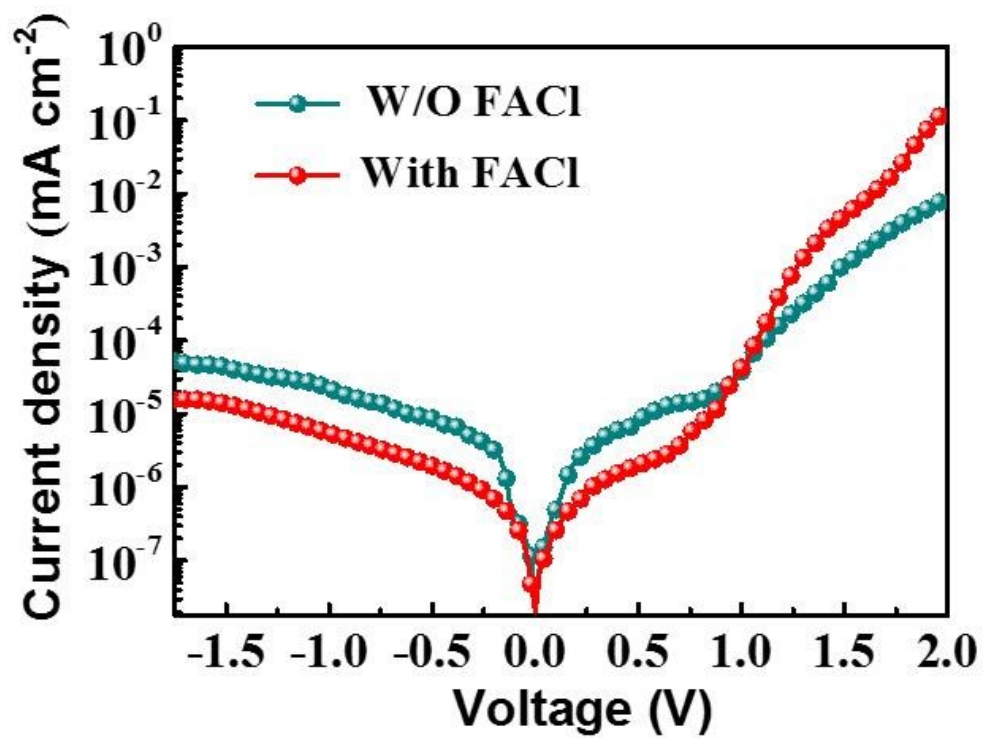

Figure S5. Dark current density of PSCs with and without FACL modification



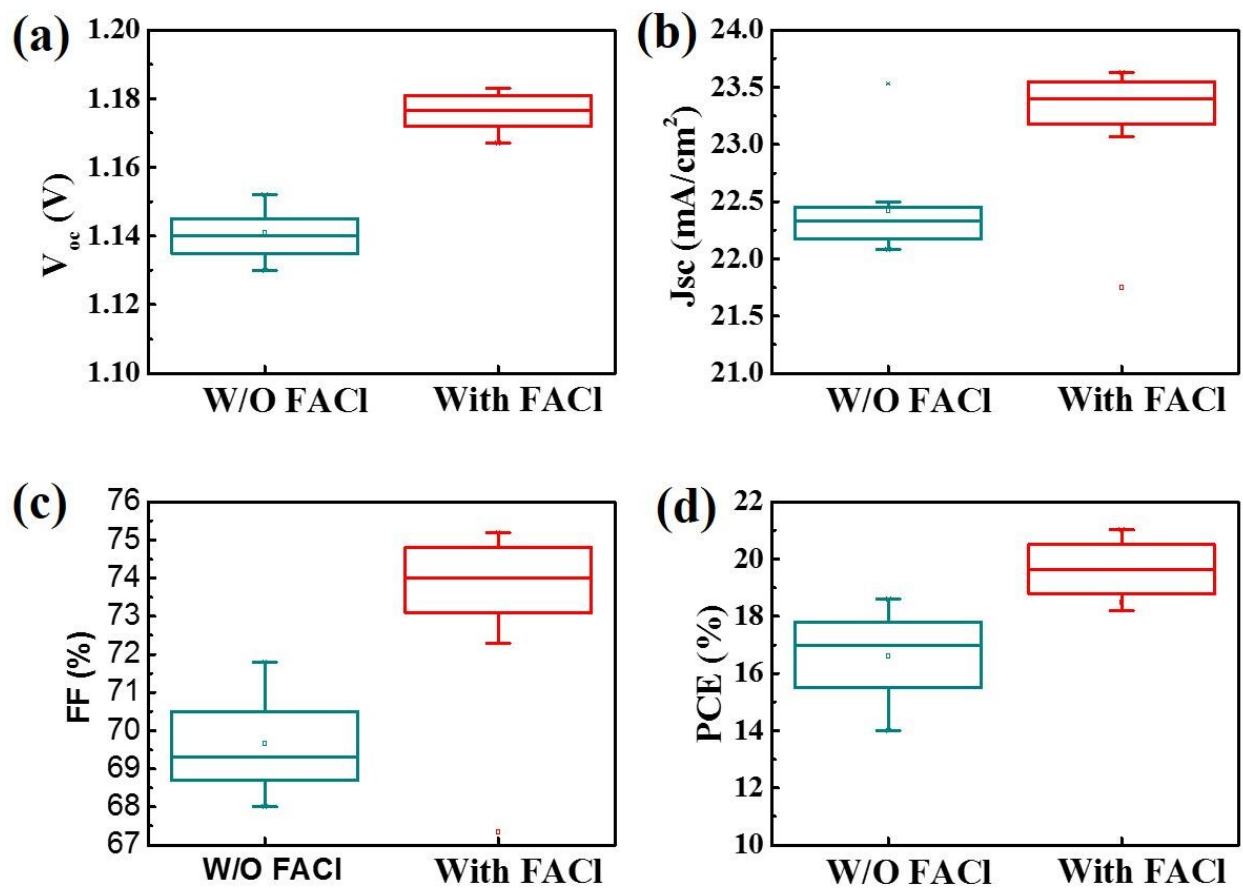

**Figure S6.** Comparison of the key photovoltaic parameters of the W/O FACI and With FACI of perovskite solar cells.

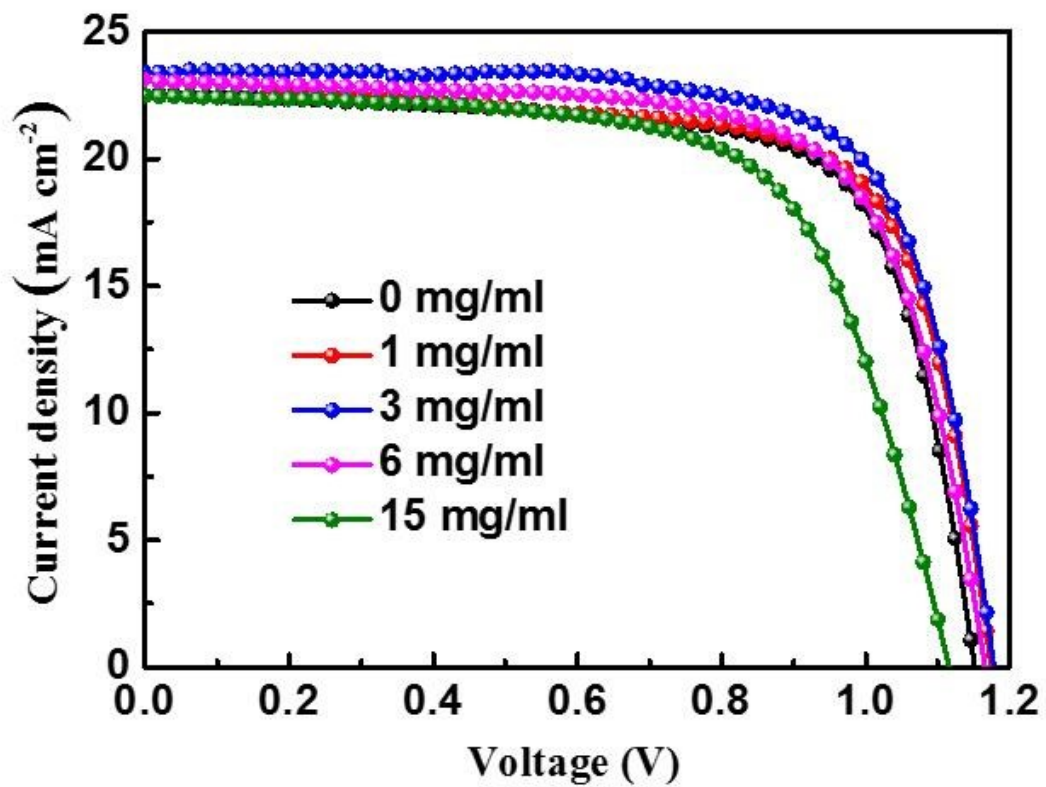

**Figure S7.**  $J$ - $V$  curves of PSCs with different concentrations of FABr additive in perovskite precursor solutions under AM 1.5G illumination of  $100 \text{ mW cm}^{-2}$

**Table S4.** Photovoltaic parameters of PSCs with different quality (mg/ml) of FABr additive in perovskite precursor solutions.

|         | $V_{oc}$ (V)      | $J_{sc}$ (mA/cm <sup>2</sup> ) | FF (%)             | PCE (%)                         |
|---------|-------------------|--------------------------------|--------------------|---------------------------------|
| 0       | 1.14±0.06 (1.150) | 22.12±0.46 (22.52)             | 69.33±1.87 (71.84) | 17.22±1.56 (18.61) <sup>a</sup> |
| 1mg/ml  | 1.17±0.02 (1.173) | 22.65±0.37 (23.19)             | 69.27±1.76 (70.07) | 18.15±1.13 (19.07) <sup>a</sup> |
| 3mg/ml  | 1.17±0.05 (1.178) | 23.13±0.32 (23.41)             | 70.42±1.15 (72.51) | 19.32±1.57 (19.99) <sup>a</sup> |
| 6mg/ml  | 1.16±0.03 (1.165) | 22.88±0.56 (23.27)             | 68.81±2.12 (70.41) | 18.36±1.85 (19.10) <sup>a</sup> |
| 15mg/ml | 1.12±0.02 (1.120) | 22.21±0.33 (22.51)             | 63.56±2.36 (65.81) | 15.06±1.53 (16.59) <sup>a</sup> |

<sup>a</sup>Numbers in parentheses show the champion device parameters.

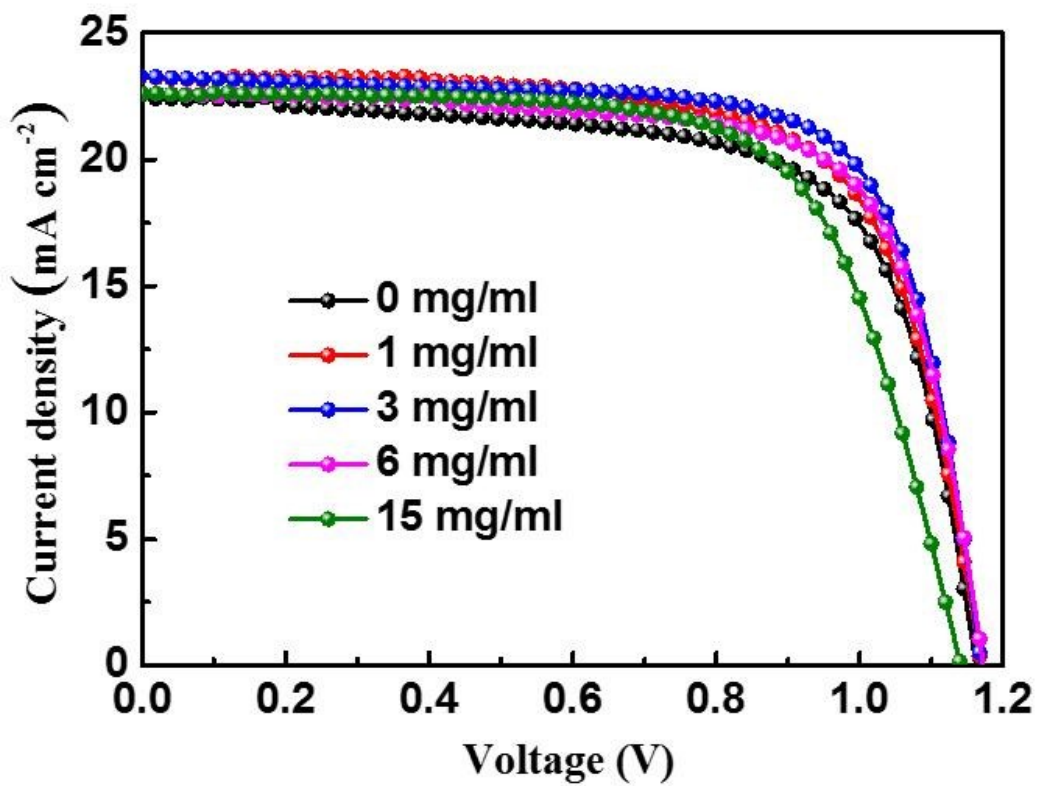

**Figure S8.**  $J$ - $V$  curves of PSCs with different concentration of FAI additive in perovskite precursor solutions under AM 1.5G illumination of  $100 \text{ mW cm}^{-2}$

**Table S5.** Photovoltaic parameters of PSCs with different quality (mg/ml) of FAI additive in perovskite precursor solutions.

|         | $V_{oc}$ (V)      | $J_{sc}$ (mA/cm <sup>2</sup> ) | FF (%)             | PCE (%)                         |
|---------|-------------------|--------------------------------|--------------------|---------------------------------|
| 0       | 1.15±0.08(1.161)  | 22.12±0.35 (22.42)             | 68.35±1.78 (70.12) | 17.25±1.67 (18.25) <sup>a</sup> |
| 1mg/ml  | 1.16±0.07 (1.168) | 22.76±0.78 (23.25)             | 68.47±1.52 (70.25) | 18.21±1.11 (19.07) <sup>a</sup> |
| 3mg/ml  | 1.16±0.08 (1.168) | 23.09±0.32 (23.28)             | 72.16±1.17 (73.07) | 19.16±0.62 (19.86) <sup>a</sup> |
| 6mg/ml  | 1.15±0.08 (1.160) | 22.56±0.62 (23.02)             | 69.53±1.37 (70.36) | 17.31±1.35 (18.78) <sup>a</sup> |
| 15mg/ml | 1.14±0.08 (1.146) | 22.12±0.55 (22.60)             | 67.26±1.25 (68.02) | 16.12±1.68 (17.62) <sup>a</sup> |

<sup>a</sup>Numbers in parentheses show the champion device parameters.

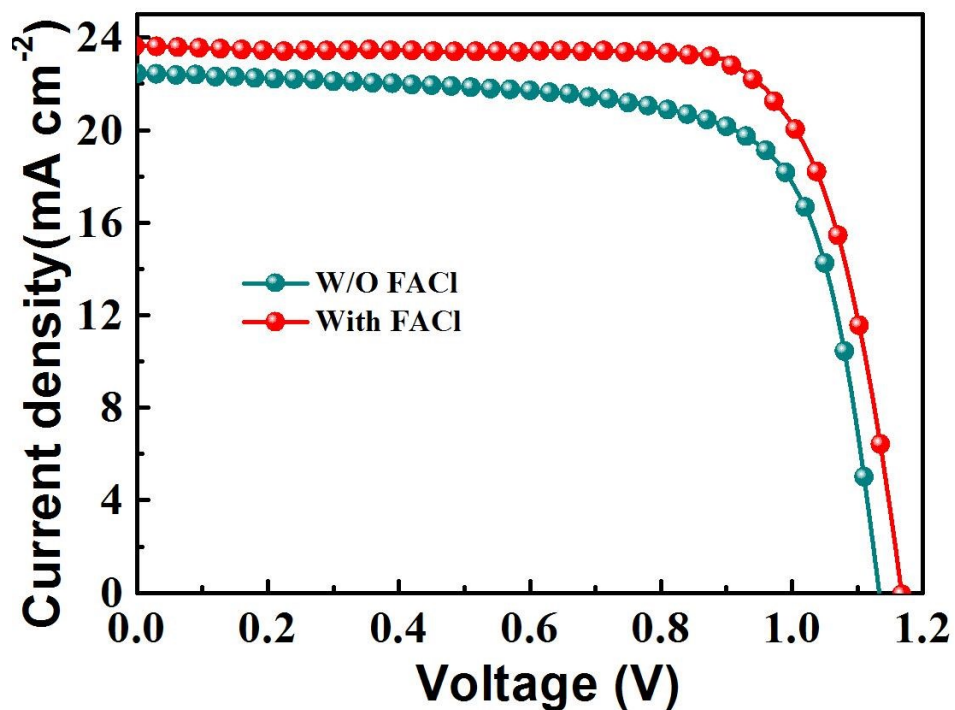

**Figure S9.**  $J$ - $V$  curves of PSCs with different concentration (0mg/mL and 3mg/mL) of FAcI additive in excessive  $\text{PbI}_2$  perovskite precursor solutions under AM 1.5G illumination of 100  $\text{mW cm}^{-2}$

**Table S6.** Photovoltaic parameters of PSCs with different concentration (0mg/mL and 3mg/mL) of FAcI additive in excessive  $\text{PbI}_2$  perovskite precursor solutions.

|        | $V_{oc}$ (V)             | $J_{sc}$ ( $\text{mA/cm}^2$ ) | FF (%)                   | PCE (%)                               |
|--------|--------------------------|-------------------------------|--------------------------|---------------------------------------|
| 0      | $1.121 \pm 0.07$ (1.133) | $22.12 \pm 0.32$ (22.46)      | $71.12 \pm 1.32$ (72.21) | $17.57 \pm 1.12$ (18.38) <sup>a</sup> |
| 3mg/mL | $1.170 \pm 0.05$ (1.172) | $23.35 \pm 0.26$ (23.62)      | $75.26 \pm 0.58$ (75.53) | $20.55 \pm 0.43$ (20.91) <sup>a</sup> |

<sup>a</sup>Numbers in parentheses show the champion device parameters.
